# Supplementary material
Source: PubMed Central journal article supplement (PMC3675260)
Supplement: mmc1.pdf [file mmc1.pdf]

## Supplemental Data

### Mutations in *PDGFRB* Cause

### Autosomal-Dominant Infantile Myofibromatosis

John A. Martignetti, Lifeng Tian, Dong Li, Maria Ramirez, Olga Camacho, Catalina Camacho-Vanegas, Yiran Guo, Dina J. Zand, Audrey M. Bernstein, Sandra K. Masur, Cecilia E. Kim, Frederick G. Otieno, Cuiping Hou, Nada Abdel-Magid, Ben Tweddale, Denise Metry, Jean-Christophe Fournet, Eniko Papp, Elizabeth W. McPherson, Carrie Zabel, Guy Vaksman, Cyril Morisot, Brendan Keating, Patrick M. Sleiman, Jeffrey A. Cleveland, David B. Everman, Elaine Zackai, and Hakon Hakonarson

Table S1. Variant analysis results of eleven affected whole-exomes

|                         | IM-1 | IM-2 | IM-3 | IM-4 | IM-5 | IM-6 | IM-7 | IM-8 | IM-9-III-1 | IM-9-III-4 | IM-9-III-9 |
|-------------------------|------|------|------|------|------|------|------|------|------------|------------|------------|
| Heterozygous<br>NS/SS/I | 7478 | 7823 | 7786 | 7775 | 7508 | 7569 | 7357 | 7555 | 8043       | 8038       | 7784       |
| Rare                    | 144  | 170  | 176  | 189  | 158  | 162  | 166  | 177  | 150        | 145        | 138        |
| Deleterious             | 35   | 33   | 31   | 31   | 37   | 30   | 30   | 31   | 31         | 30         | 30         |
| <i>PDGFRB</i>           | 1    | 1    | 1    | 1    | 1    | 1    | 1    | 1    | 0          | 0          | 0          |
| <i>NOTCH3</i>           | 0    | 0    | 0    | 0    | 0    | 0    | 0    | 0    | 1          | 1          | 1          |
| <i>PET112</i>           | 0    | 0    | 0    | 0    | 0    | 0    | 0    | 0    | 1          | 1          | 1          |
